# Supplementary material for: BKM-120 (Buparlisib): A Phosphatidyl-Inositol-3 Kinase Inhibitor with Anti-Invasive Properties in Glioblastoma
Source: PubMed Central journal article supplement (PMC4742861; doi:10.1038/srep20189), 2016-02-05
Supplement: srep20189-s1.pdf [file srep20189-s1.pdf]

**Supplementary information for**

**BKM-120 (Buparlisib): A Phosphatidyl-Inositol-3 Kinase Inhibitor with Anti-Invasive**

**Properties in Glioblastoma** by Maria-Carmela Speranza, Michal O. Nowicki, Prajna Behera,

Choi-Fong Cho, E. Antonio Chiocca, Sean E. Lawler

# SUPPLEMENTARY 1

### Neural Stem Cells (SCP27)

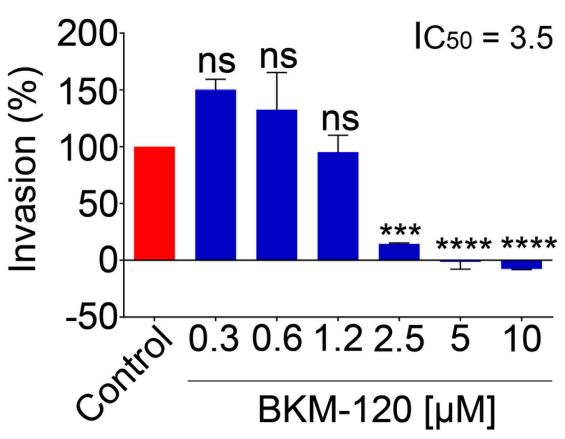

### Astrocytes

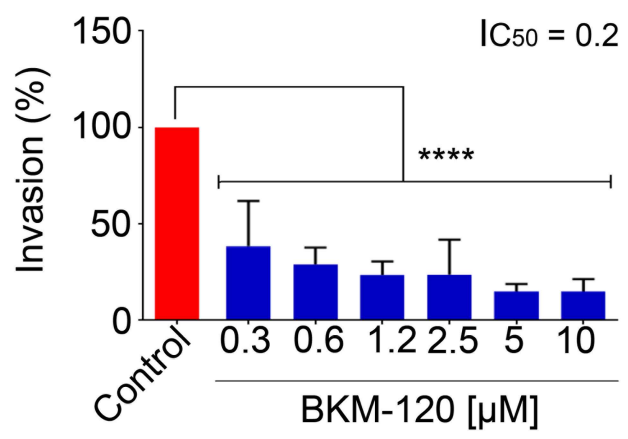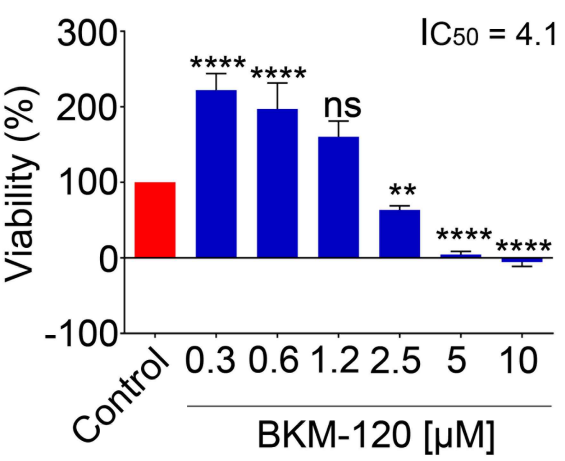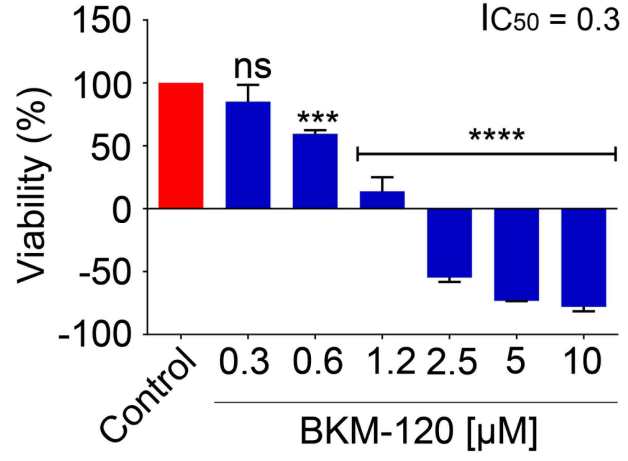

# SUPPLEMENTARY 2

## A

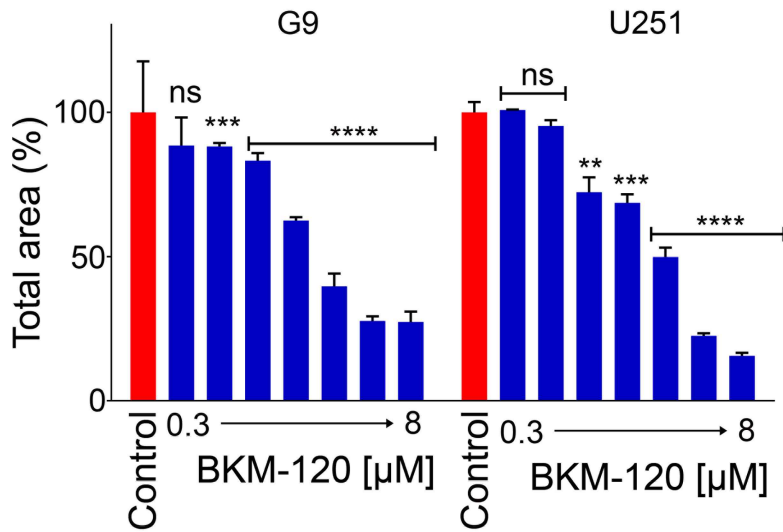

## C

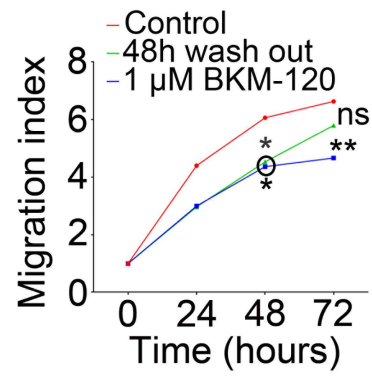

## D

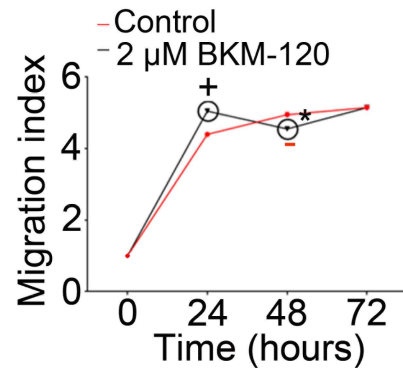

## B

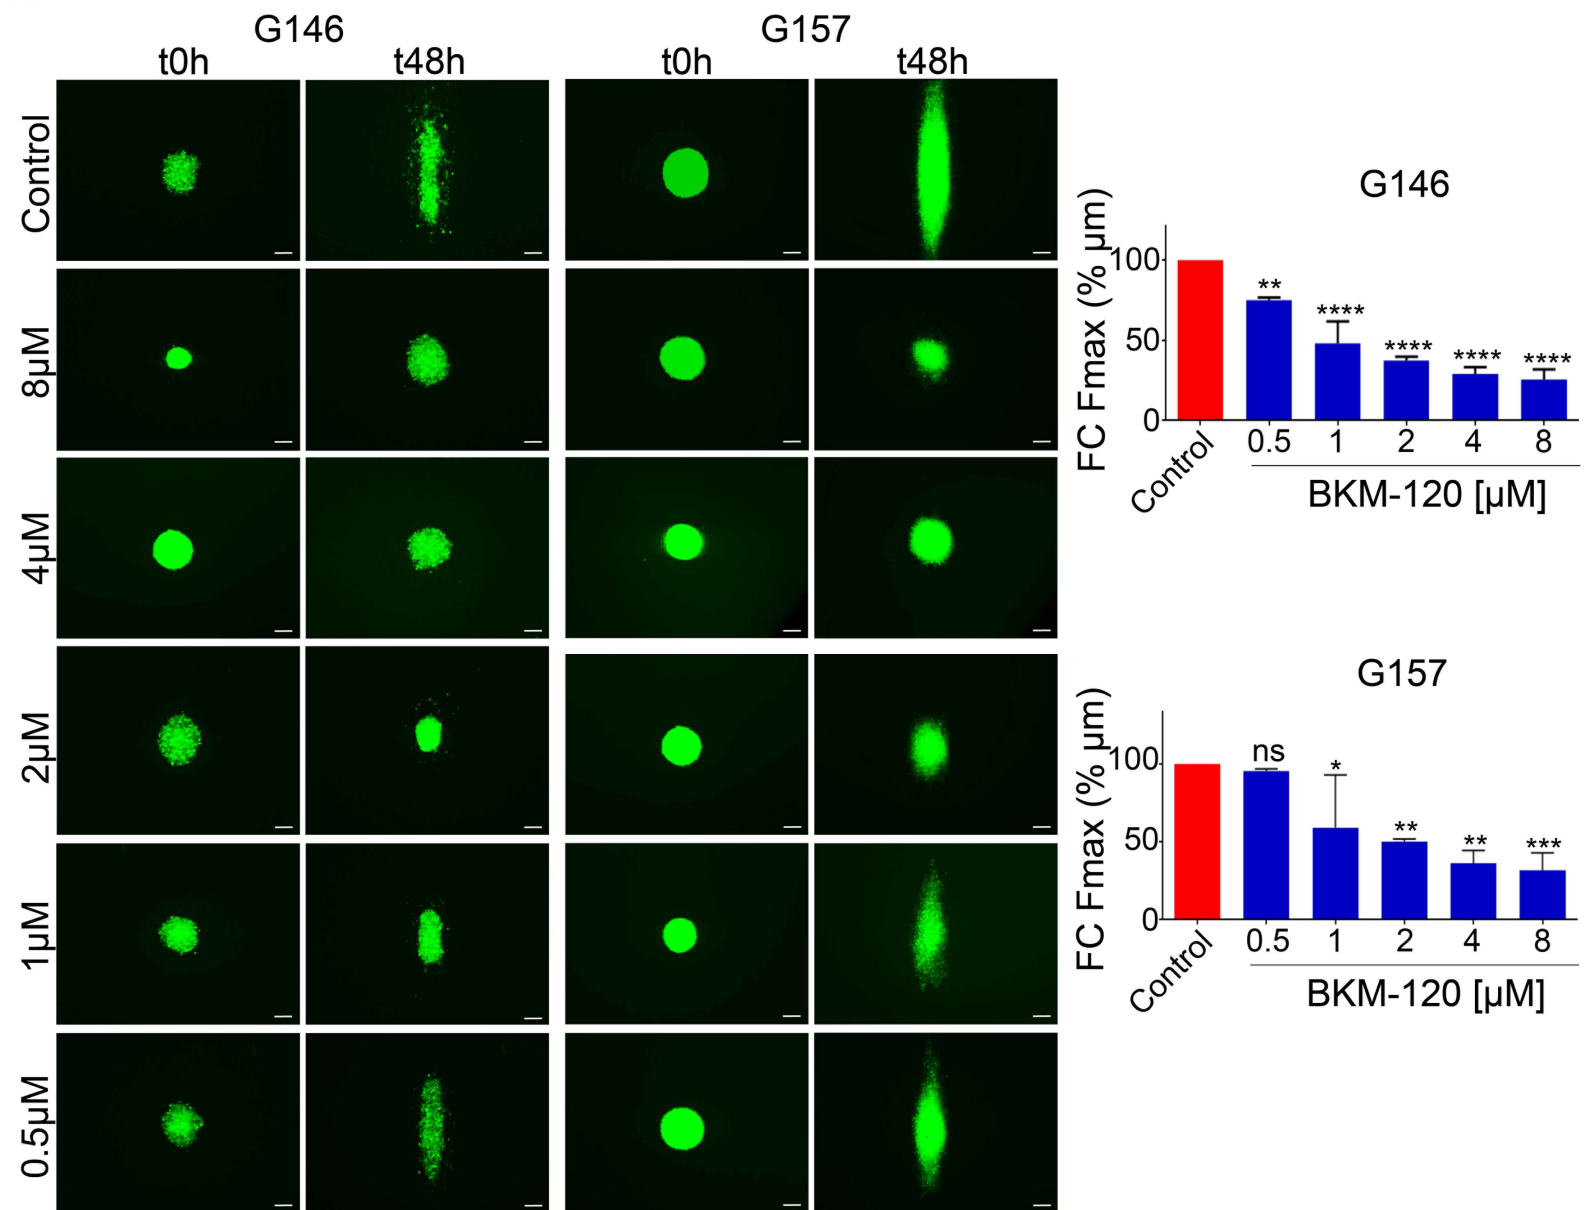

# SUPPLEMENTARY 3

## A

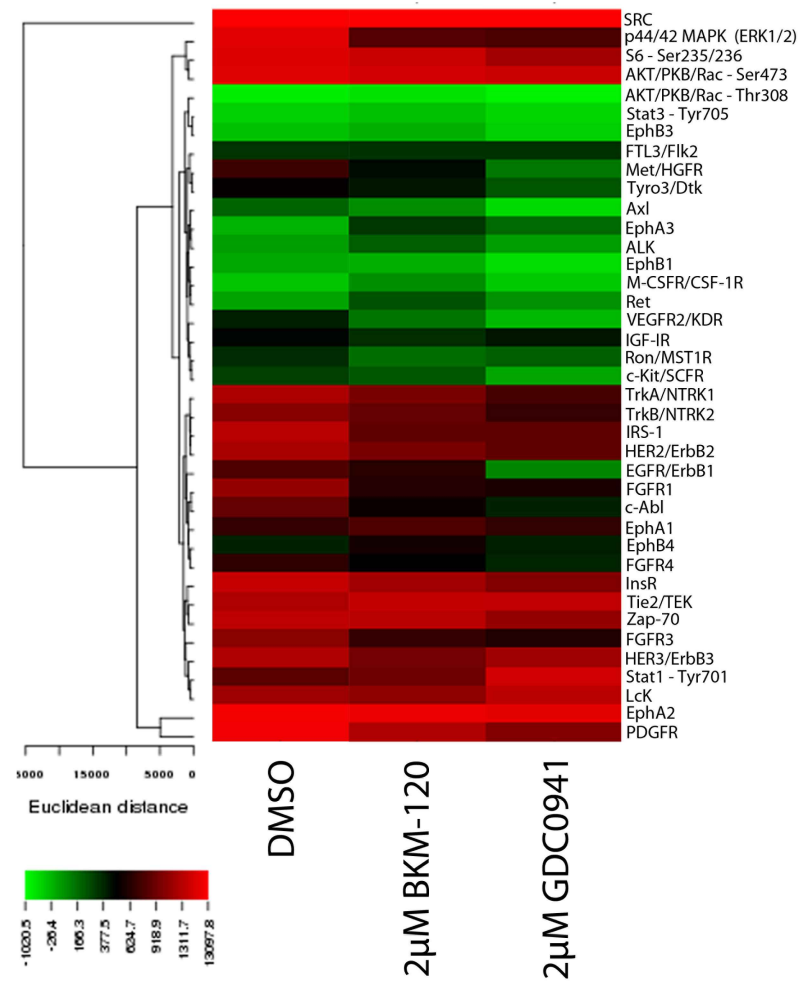

## B

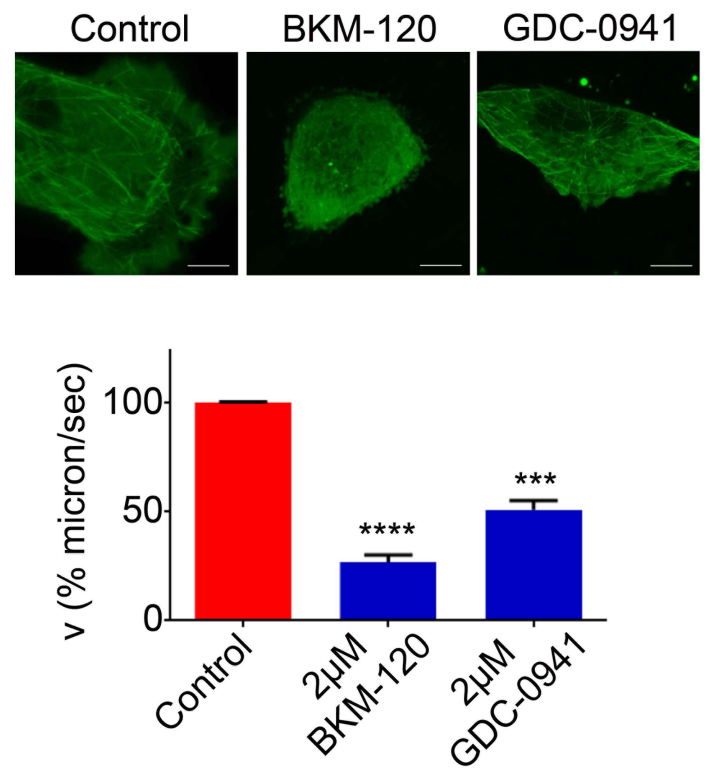

## C

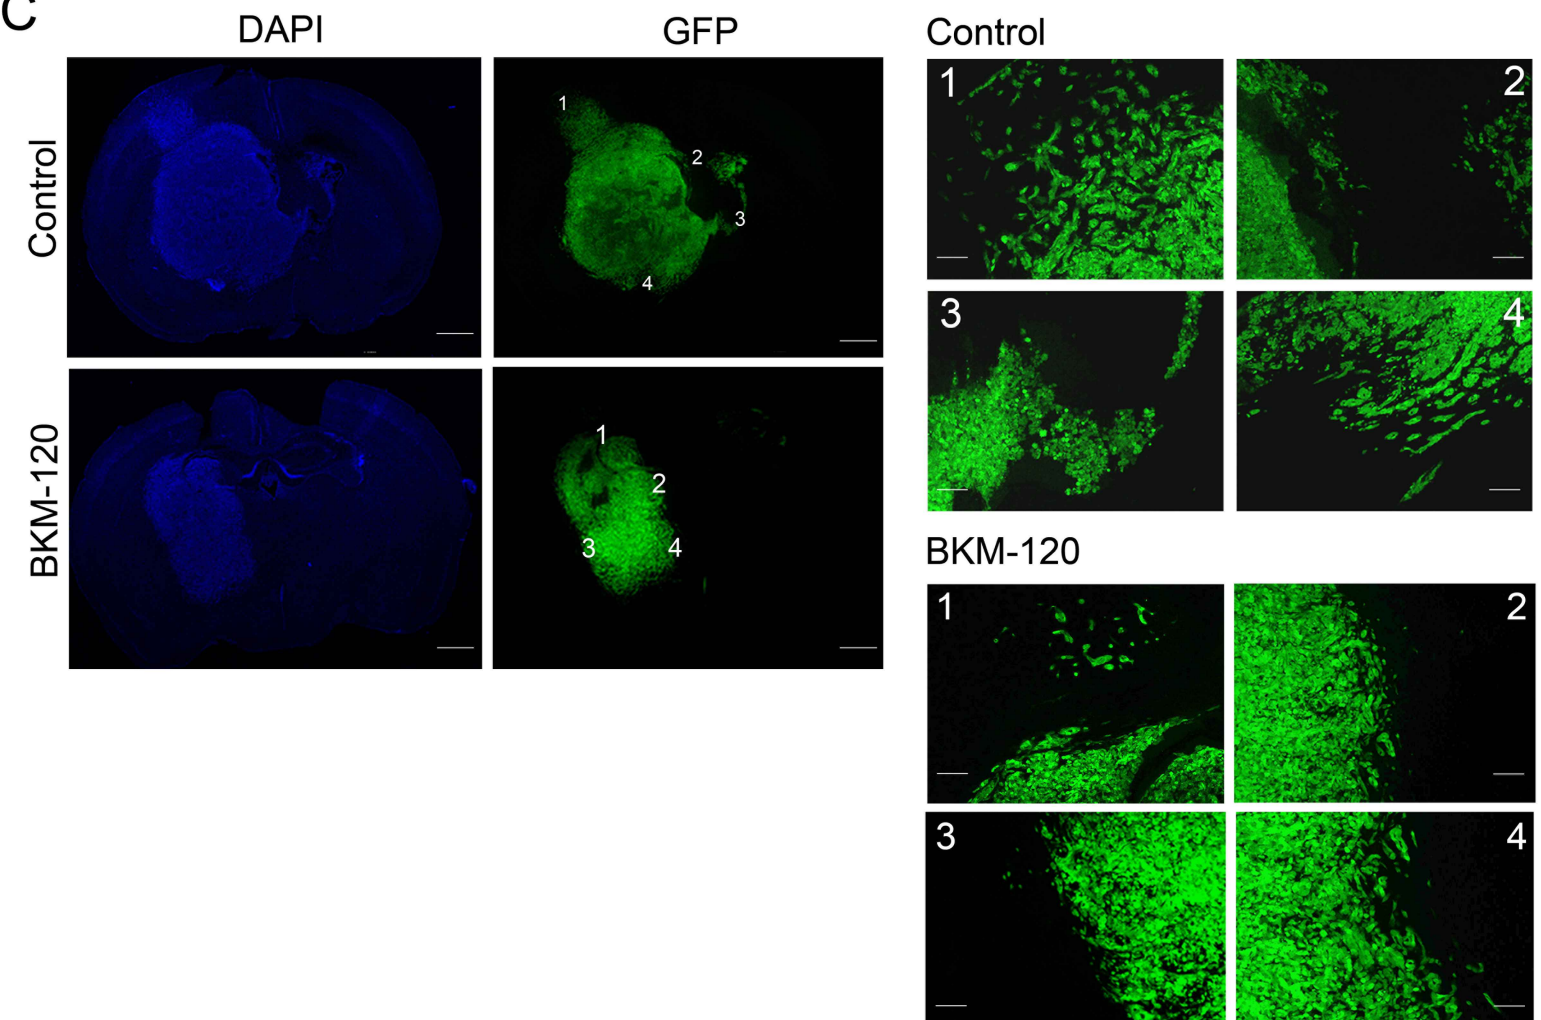



**SUPPLEMENTARY TABLE 1**

| <i>Kinase</i>    | <b>1<math>\mu</math>M GDC-0941</b> |           | <b>1<math>\mu</math>M BKM-120</b> |           |
|------------------|------------------------------------|-----------|-----------------------------------|-----------|
|                  | <i>% activity remaining</i>        | <i>SD</i> | <i>% activity remaining</i>       | <i>SD</i> |
| PI3K a E542K-p85 | 1                                  | 0         | 3                                 | 1         |
| PI3Ka E545K-p85  | 1                                  | 0         | 3                                 | 0         |
| PI3K b           | 4                                  | 0         | 12                                | 0         |
| PI3K a           | 4                                  | 0         | 6                                 | 0         |
| PI3K g           | 36                                 | 6         | 51                                | 7         |
| SPHK1            | 55                                 | 23        | 75                                | 15        |
| CHK a            | 66                                 | 11        | 77                                | 2         |
| PIK4CB           | 80                                 | 12        | 83                                | 1         |
| SPHK2            | 82                                 | 26        | 78                                | 17        |
| CHK b            | 90                                 | 0         | 85                                | 5         |
| PI4K2a           | 95                                 | 11        | 97                                | 1         |
| DGK g            | 96                                 | 12        | 104                               | 14        |
| DGK z            | 97                                 | 4         | 102                               | 5         |
| DGK b            | 101                                | 2         | 111                               | 11        |
| PIP5K2A          | 104                                | 11        | 111                               | 8         |

**SUPPLEMENTARY TABLE 2**

| <b>1<math>\mu</math>M GDC-0941</b> |                             |           | <b>1<math>\mu</math>M BKM-120</b> |                             |           |
|------------------------------------|-----------------------------|-----------|-----------------------------------|-----------------------------|-----------|
| <i>Kinase</i>                      | <i>% activity remaining</i> | <i>SD</i> | <i>Kinase</i>                     | <i>% activity remaining</i> | <i>SD</i> |
| ABL                                | nd                          | nd        | ABL                               | 92                          | 10        |
| AMPK                               | 76                          | 8         | AMPK                              | 100                         | 20        |
| ASK1                               | 83                          | 2         | ASK1                              | 105                         | 7         |
| Aurora A                           | 94                          | 12        | Aurora A                          | 110                         | 18        |
| Aurora B                           | 82                          | 9         | Aurora B                          | 90                          | 13        |
| BRK                                | nd                          | nd        | BRK                               | 93                          | 17        |
| BRSK1                              | 92                          | 8         | BRSK1                             | 102                         | 6         |
| BRSK2                              | 87                          | 0         | BRSK2                             | 106                         | 9         |
| BTK                                | 79                          | 4         | BTK                               | 110                         | 20        |
| CAMK1                              | 82                          | 11        | CAMK1                             | 137                         | 4         |
| CAMKK beta                         | 80                          | 0         | CAMKK beta                        | nd                          | nd        |
| CAMKKb                             | nd                          | nd        | CAMKKb                            | 99                          | 4         |
| CDK2-Cyclin A                      | 103                         | 6         | CDK2-Cyclin A                     | 98                          | 7         |
| CDK9-Cyclin T1                     | nd                          | nd        | CDK9-Cyclin T1                    | 131                         | 6         |
| CHK1                               | 85                          | 3         | CHK1                              | 95                          | 8         |
| CHK2                               | 99                          | 5         | CHK2                              | 92                          | 17        |
| CK1 $\gamma$ 2                     | nd                          | nd        | CK1 $\gamma$ 2                    | 93                          | 10        |
| CK1 $\delta$                       | 83                          | 2         | CK1 $\delta$                      | 103                         | 2         |
| CK2                                | 105                         | 3         | CK2                               | 94                          | 16        |
| CLK2                               | 30                          | 2         | CLK2                              | 60                          | 1         |
| CSK                                | 83                          | 10        | CSK                               | 118                         | 28        |
| DAPK1                              | 77                          | 11        | DAPK1                             | 129                         | 8         |
| DDR2                               | nd                          | nd        | DDR2                              | 98                          | 5         |
| DYRK1A                             | 92                          | 0         | DYRK1A                            | 79                          | 11        |
| DYRK2                              | 63                          | 3         | DYRK2                             | 110                         | 9         |
| DYRK3                              | 85                          | 3         | DYRK3                             | 74                          | 4         |
| EF2K                               | 98                          | 4         | EF2K                              | 103                         | 2         |
| EIF2AK3                            | nd                          | nd        | EIF2AK3                           | 101                         | 4         |
| EPH-A2                             | 100                         | 11        | EPH-A2                            | 114                         | 17        |
| EPH-A4                             | 107                         | 8         | EPH-A4                            | 96                          | 5         |
| EPH-B1                             | 101                         | 9         | EPH-B1                            | 103                         | 9         |
| EPH-B2                             | 94                          | 1         | EPH-B2                            | 100                         | 5         |
| EPH-B3                             | 92                          | 0         | EPH-B3                            | 99                          | 3         |

|             |     |    |             |     |    |
|-------------|-----|----|-------------|-----|----|
| EPH-B4      | 88  | 12 | EPH-B4      | 103 | 29 |
| ERK1        | 93  | 10 | ERK1        | 105 | 2  |
| ERK2        | 72  | 3  | ERK2        | 98  | 21 |
| ERK5        | nd  | nd | ERK5        | 98  | 13 |
| ERK8        | 79  | 1  | ERK8        | 97  | 2  |
| FGF-R1      | 91  | 12 | FGF-R1      | 106 | 28 |
| GCK         | 83  | 4  | GCK         | 92  | 19 |
| GSK3 beta   | 69  | 6  | GSK3b       | 97  | 10 |
| HER4        | 77  | 8  | HER4        | 107 | 22 |
| HIPK1       | 83  | 2  | HIPK1       | 105 | 15 |
| HIPK2       | 52  | 2  | HIPK2       | 89  | 6  |
| HIPK3       | 81  | 8  | HIPK3       | 97  | 20 |
| IGF-1R      | 84  | 0  | IGF-1R      | 96  | 4  |
| IKK beta    | 87  | 0  | IKK beta    | 89  | 15 |
| IKK epsilon | 83  | 3  | IKK epsilon | 116 | 4  |
| IR          | 93  | 7  | IR          | 88  | 19 |
| IRAK1       | nd  | nd | IRAK1       | 97  | 1  |
| IRAK4       | 75  | 1  | IRAK4       | 102 | 13 |
| IRR         | 81  | 15 | IRR         | 94  | 4  |
| JAK2        | 83  | 4  | JAK2        | 99  | 3  |
| JNK1        | 97  | 3  | JNK1        | 101 | 10 |
| JNK2        | 83  | 3  | JNK2        | 99  | 6  |
| JNK3        | 72  | 4  | JNK3        | 93  | 10 |
| Lck         | 100 | 6  | Lck         | 119 | 31 |
| LKB1        | 52  | 5  | LKB1        | 108 | 19 |
| MAP4K3      | nd  | nd | MAP4K3      | 93  | 10 |
| MAP4K5      | nd  | nd | MAP4K5      | 110 | 11 |
| MAPKAP-K2   | 82  | 2  | MAPKAP-K2   | 92  | 21 |
| MAPKAP-K3   | 83  | 1  | MAPKAP-K3   | 106 | 10 |
| MARK1       | 97  | 1  | MARK1       | 95  | 3  |
| MARK2       | 79  | 6  | MARK2       | 95  | 10 |
| MARK3       | 99  | 0  | MARK3       | 91  | 12 |
| MARK4       | 93  | 1  | MARK4       | 85  | 0  |
| MEKK1       | 92  | 3  | MEKK1       | 96  | 25 |
| MELK        | 72  | 15 | MELK        | 109 | 2  |
| MINK1       | 76  | 1  | MINK1       | 104 | 1  |
| MKK1        | 80  | 12 | MKK1        | 106 | 1  |



|           |     |    |           |     |    |
|-----------|-----|----|-----------|-----|----|
| MKK2      | 82  | 0  | MKK2      | 100 | 6  |
| MKK6      | 77  | 10 | MKK6      | 99  | 1  |
| MLK1      | 74  | 3  | MLK1      | 82  | 6  |
| MLK3      | 74  | 8  | MLK3      | 88  | 14 |
| MNK1      | 95  | 4  | MNK1      | 92  | 4  |
| MNK2      | 91  | 2  | MNK2      | 97  | 12 |
| MPSK1     | nd  | nd | MPSK1     | 102 | 10 |
| MSK1      | 72  | 1  | MSK1      | 96  | 3  |
| MST2      | 98  | 11 | MST2      | 97  | 13 |
| MST3      | nd  | nd | MST3      | 108 | 14 |
| MST4      | 93  | 2  | MST4      | 97  | 1  |
| NEK2a     | 78  | 9  | NEK2a     | 102 | 5  |
| NEK6      | 100 | 7  | NEK6      | 97  | 1  |
| NUAK1     | 79  | 4  | NUAK1     | 94  | 14 |
| OSR1      | nd  | nd | OSR1      | 95  | 5  |
| p38a MAPK | 78  | 4  | p38a MAPK | 113 | 12 |
| p38b MAPK | 90  | 1  | p38b MAPK | 94  | 9  |
| p38d MAPK | 89  | 9  | p38d MAPK | 95  | 13 |
| p38g MAPK | 96  | 5  | p38g MAPK | 98  | 9  |
| PAK2      | 95  | 5  | PAK2      | 114 | 3  |
| PAK4      | 85  | 0  | PAK4      | 111 | 14 |
| PAK5      | 80  | 0  | PAK5      | 107 | 29 |
| PAK6      | 89  | 2  | PAK6      | 93  | 14 |
| PDGFRA    | nd  | nd | PDGFRA    | 91  | 7  |
| PDK1      | 90  | 9  | PDK1      | 100 | 5  |
| PHK       | 98  | 7  | PHK       | 95  | 21 |
| PIM1      | 82  | 13 | PIM1      | 103 | 2  |
| PIM2      | 87  | 10 | PIM2      | 92  | 3  |
| PIM3      | 87  | 0  | PIM3      | 94  | 2  |
| PINK      | nd  | nd | PINK      | 87  | 10 |
| PKA       | 103 | 3  | PKA       | 104 | 2  |
| PKBa      | 89  | 7  | PKBa      | 96  | 9  |
| PKBb      | 63  | 8  | PKBb      | 95  | 16 |
| PKCa      | 99  | 10 | PKCa      | 102 | 15 |
| PKCz      | 82  | 3  | PKCz      | 93  | 5  |
| PKCy      | nd  | nd | PKCy      | 104 | 2  |
| PKD1      | 79  | 10 | PKD1      | 104 | 6  |

|        |     |    |        |     |    |
|--------|-----|----|--------|-----|----|
| PLK1   | 96  | 5  | PLK1   | 90  | 6  |
| PRAK   | 100 | 6  | PRAK   | 93  | 21 |
| PRK2   | 71  | 6  | PRK2   | 88  | 13 |
| RIPK2  | 84  | 1  | RIPK2  | 85  | 4  |
| ROCK 2 | 73  | 2  | ROCK 2 | 108 | 16 |
| RSK1   | 86  | 2  | RSK1   | 120 | 23 |
| RSK2   | 82  | 0  | RSK2   | 104 | 0  |
| S6K1   | 81  | 2  | S6K1   | 106 | 33 |
| SGK1   | 93  | 6  | SGK1   | 100 | 0  |
| SIK2   | nd  | nd | SIK2   | 104 | 5  |
| SIK3   | nd  | nd | SIK3   | 101 | 2  |
| SmMLCK | 70  | 9  | SmMLCK | 80  | 8  |
| Src    | 76  | 6  | Src    | 91  | 12 |
| SRPK1  | 90  | 1  | SRPK1  | 97  | 8  |
| STK33  | nd  | nd | STK33  | 93  | 20 |
| SYK    | 100 | 7  | SYK    | 90  | 1  |
| TAK1   | 80  | 8  | TAK1   | 83  | 25 |
| TAO1   | 83  | 5  | TAO1   | 80  | 7  |
| TBK1   | 80  | 0  | TBK1   | 102 | 4  |
| TESK1  | nd  | nd | TESK1  | 112 | 15 |
| TGFBR1 | nd  | nd | TGFBR1 | 74  | 20 |
| TIE2   | nd  | nd | TIE2   | 91  | 13 |
| TLK1   | nd  | nd | TLK1   | 105 | 10 |
| TrkA   | 67  | 6  | TrkA   | 92  | 12 |
| TSSK1  | nd  | nd | TSSK1  | 100 | 10 |
| TTBK1  | nd  | nd | TTBK1  | 100 | 1  |
| TTBK2  | nd  | nd | TTBK2  | 89  | 17 |
| TTK    | 79  | 1  | TTK    | 87  | 2  |
| ULK1   | nd  | nd | ULK1   | 95  | 13 |
| ULK2   | nd  | nd | ULK2   | 96  | 4  |
| VEGFR1 | 74  | 12 | VEG-FR | 90  | 3  |
| WNK1   | nd  | nd | WNK1   | 114 | 2  |
| YES1   | 84  | 2  | YES1   | 87  | 8  |
| ZAP70  | nd  | nd | ZAP70  | 102 | 1  |

## Supplementary Legends

**Supplementary Table 1.** Panel of 15 lipid kinases. The table indicates kinase name, the percent activity remaining and the standard deviation for each kinase after treatment with 1  $\mu\text{M}$  of GDC-041 and 1  $\mu\text{M}$  BKM-120. Experiments were performed at the International Centre for Kinase Profiling, Dundee, UK.

**Supplementary Table 2.** Panel of 140 protein kinases. The table indicate the kinase name, the % of activity remained and the standard deviation for each kinase after treatment with 1  $\mu\text{M}$  of GDC-041 and 1  $\mu\text{M}$  BKM-120. Experiments were performed at the International Centre for Kinase Profiling, Dundee, UK.

**Supplementary Fig. 1. Effect of BKM-120 on neural stem cells and astrocytes.** Dose-dependent effect of BKM-120 on invasion and cell viability/proliferation analysis of neural stem cells (SCP27) and astrocytes after 48 hours. IC50 was calculated using data from a range of BKM-120 concentrations.

**Supplementary Fig. 2. BKM-120 inhibits G9-copGFP, U251-copGFP, G146-copGFP and G157-copGFP GSC migration in a dose-dependent manner and its effect is reversible.** A, The graph shows a dose-dependent effect of BKM-120 on U251-copGFP and G9-copGFP in wound-healing assays at 48 h. B, Time course over 48 hours on nanofiber scaffolds of G146 and G157 GBM cells treated with 8, 4, 2, 1 and 0.5  $\mu\text{M}$  BKM-120. The graphs indicate percentage of migration index compared to controls at 48 hours (100%) (bar = 100  $\mu\text{m}$ ). C, Time course of

migration over 72 hours in the presence of 1  $\mu\text{M}$  BKM-120. The drug wash out performed at 48 hours demonstrates recovery of cell migration after drug removal. Control in red, 1  $\mu\text{M}$  of BKM-120 in blue, BKM-120 wash out at 48h is shown in green. D, Time course over 72 hours of G9-copGFP GSCs. Control in red, BKM-120 in black. Spheres were treated with 2  $\mu\text{M}$  BKM-120 (+) at 24h and wash out (-) was performed at 48h. All the experiments were performed in triplicate. ImageJ was used for the quantification. Control always treated with DMSO. One-way ANOVA was performed with Prism6 software (ns, not significant, \* $p < 0.05$ , \*\* $p < 0.01$ , \*\*\* $p < 0.001$ , \*\*\*\* $p < 0.0001$ ).

**Supplementary Fig. 3. Effect of BKM-120 and GDC-0941 on 39 phospho-proteins, microtubule dynamics and *in vivo* studies.** A, ELISA-based screen of 39 major phospho-proteins (Cell Signaling, #7949). G157 GBM cells were treated for 30 minutes with BKM-120 or GDC-0941 (2  $\mu\text{M}$ ). Control was treated with DMSO. One matrix CIMminer (Weinstein, et al., Science 1997; 275:343-349) was used to build the heatmap. B, U1242-EB1-GFP time-lapse (bar = 10  $\mu\text{m}$ ) at 6h after DMSO, BKM-120 and GDC-0941 (2  $\mu\text{M}$ ). The velocity (microns/sec) of EB1 was quantified with ImageJ. C, G9-copGFP cells were intracranially injected in nude mice and treated daily with 20 mg/kg of BKM-120 by gavage. Tumor spread was examined using GFP and DAPI staining. Photographs illustrate tumor growth (low resolution, bar = 1 mm) and the tumor normal brain interface indicating the degree of invasion (high resolution, bar = 20  $\mu\text{m}$ ). The measurements were made in triplicate. One-way ANOVA was performed with Prism6 software (ns not significant, \* $p < 0.05$ , \*\* $p < 0.01$ , \*\*\*\* $p < 0.0001$ ).

**Supplementary Fig. 4. PI3K isoform and PTEN expression in GSCs.** PI3K p110  $\alpha/\beta/\delta/\gamma$ , PI3K p85, PI3K III (Cell Signaling #9655), PI3K p110  $\delta$  (Santa Cruz sc-7176) and PTEN (Cell Signaling #9552) expression levels were measured by Western blot. GAPDH was used as housekeeping gene. The measurements were made in triplicate. One-way ANOVA was performed with Prism6 software (ns not significant, \* $p < 0.05$ , \*\* $p < 0.01$ , \*\*\*\* $p < 0.0001$ ).
